# Supplementary material
Source: PubMed Central journal article supplement (PMC6452711)
Supplement: pnas.1900351116.sapp.pdf [file pnas.1900351116.sapp.pdf]

## Supplemental Information for

### **Triggering of a Dll4-Notch1 loop impairs wound healing in diabetes**

Xiaowei Zheng (郑晓伟)<sup>a,b,1,2</sup>, Sampath Narayanan<sup>a,b,1</sup>, Vivekananda Gupta Sunkari<sup>a,1,3</sup>, Sofie Eliasson<sup>a,b</sup>, Ileana Ruxandra Botusan<sup>a,b</sup>, Jacob Grünler<sup>a,b</sup>, Anca Irinel Catrina<sup>c</sup>, Freddy Radtke<sup>d</sup>, Cheng Xu<sup>a,b</sup>, Allan Zhao<sup>a</sup>, Neda Rajamand Ekberg<sup>a,b</sup>, Urban Lendahl<sup>e</sup>, and Sergiu-Bogdan Catrina<sup>a,b,f,2</sup>

<sup>a</sup>Department of Molecular Medicine and Surgery, Karolinska Institutet, 17176 Stockholm, Sweden; <sup>b</sup>Department of Endocrinology and Diabetes, Karolinska University Hospital, 17176 Stockholm, Sweden; <sup>c</sup>Department of Rheumatology, Karolinska University Hospital Solna, 17176 Stockholm, Sweden; <sup>d</sup>Ecole Polytechnique Fédérale de Lausanne, Swiss Institute for Experimental Cancer Research, 1015 Lausanne, Switzerland; <sup>e</sup>Department of Cell and Molecular Biology, Karolinska Institutet, 17165 Stockholm, Sweden; and <sup>f</sup>Center for Diabetes, Academic Specialist Centrum, 11365 Stockholm, Sweden.

<sup>1</sup>X.Z., S.N., and V.G.S. contributed equally to this work. <sup>2</sup>To whom correspondence may be addressed. Email: xiaowei.zheng@ki.se or Sergiu-Bogdan.Catrina@ki.se. <sup>3</sup>Present address: Department of Infectious Diseases and Geographic Medicine, Stanford University, Palo Alto, CA 94305.

#### **This PDF file includes:**

Section 1: Gene Lists of Mouse Notch Signaling Target RT<sup>2</sup> Profiler PCR Array

Section 2: Primers used for SYBR green quantitative real-time PCR

Section 3: Antibody information

Section 4: Supplemental methods for laser microdissection followed by RNA purification and Quantitative RT-PCR

Table S1: Gene list with fold change and *p* value in RT<sup>2</sup> Profiler PCR array

Table S2: Information of the patients with diabetes and Controls

Supplemental figures and figure legends: Fig. S1 to S13

## **Section 1:**

### **Gene Lists of Mouse Notch Signaling Target RT<sup>2</sup> Profiler PCR Array**

#### **Cell Fate Commitment**

Hes1, Jag1, Runx2, Sox9.

#### **Developmental Processes**

Embryonic Development: Edn1, Efnb1, Foxc1, Hes1, Pbx1, Pcdh8, Pdgfra, Pdgfrb, Rbpj, Tcf15, Vegfa, Wnt4, Wnt5a.

Muscle Development: Edn1, Egr3, Foxc1, Hbegf (Dtr), Hey2, Igfbp3, Jag1, Pdgfb, Pdgfrb, Tnc.

Epidermis Development: Jag1, Krt14, Ptgs2 (COX2), Sox9, Tcf15.

Immune System Development: Id2, Jag1, Jun, Kitl (SCF), Pbx1, Runx1 (AML1), Sgpl1, Vegfa.

Nervous System Development: Bdnf, Ccnd2, Efnal, Efnb1, Egr3, Fabp7, Foxc1, Hes1, Hey1, Hey2, Heyl, Id3, Id4, Jag1, Kalrn, Nes, Pbx1, Rbpj, Rnd1, Vegfa.

Vasculature Development: Edn1, Efnal, Flt1 (VEGFR1), Foxc1, Hey2, Id1, Jag1, Jun, Rbpj, Runx1 (AML1), Sgpl1, Vegfa.

Kidney Development: Adamts1, Bdnf, Foxc1, Pbx1, Pdgfrb, Sgpl1.

Other Developmental Processes: Nrarp, S1pr3.

#### **Signal Transduction**

Notch Signaling: Crebbp (CBP), Foxc1, Hes1, Hey1, Hey2, Heyl, Jag1, Lfng, Rbpj, Snw1 (Skiip).

WNT Signaling: Ccnd1, Frzb (FRP-3), Fzd5, Wisp1, Wnt4, Wnt5a, Wnt6.

#### **Apoptosis**

Ab11, Bdnf, Foxc1, Gadd45b, Id3, Igfbp3, Jun, Kalrn, Ptgs2 (COX2), Sgpl1, Socs3, Sox9, Vegfa.

#### **Cytokines**

Cx3cl1, Cxcl12 (Sdf1), Cxcl1 (Gro1), Il33, Nampt.

#### **Transcription Factors**

Cbfa2t3, Clock, Crebbp (CBP), Egr3, Foxc1, Hey1, Hey2, Heyl, Jun, Msc, Pbx1, Rbpj, Runx1 (AML1), Runx2, Sox9, Tcf15.

#### **Other Notch Signaling Targets**

Fjx1, Gpsm2, Hspb8, Mark1, Rhov, Tec.

## **Section 2:**

### **Primers used for SYBR green quantitative real-time PCR**

#### ***Primer name: DNA sequence (5'->3'):***

Mouse *Hey1*\_F GCG CGG ACG AGAATG GAAA  
Mouse *Hey1*\_R TCA GGT GAT CCA CAG TCA TCT G  
Mouse *Dll1*\_F CCA AGT GCC AGT CAC AGA G  
Mouse *Dll1*\_R GCT TCC ATC TTA CAC CTC AGT C  
Mouse *Dll4*\_F TTC CAG GCAACC TTC TCC GA  
Mouse *Dll4*\_R ACT GCC GCT ATT CTT GTC CC  
Mouse *Hes1*\_F CCA GCC AGT GTC AAC ACG A  
Mouse *Hes1*\_R AAT GCC GGG AGC TAT CTT TCT  
Mouse *PDGFR $\beta$* \_F AAG TGT GAG ACAATA GTG ACC CC  
Mouse *PDGFR $\beta$* \_R CAT GGG TGT GCT TAAACT TTC G  
Mouse *PBGD*\_F GTG TTG CAC GAT CCT GAAACT  
Mouse *PBGD*\_R GTT GCC CAT CCT TTA TCA CTG TA  
Mouse *SDF1*-F GAG AGC CAC ATC GCC AGA G  
Mouse *SDF1*-R TTT CGG GTC AAT GCA CAC TTG  
Mouse *CXCR4*-F AGC ATG ACG GAC AAG TAC C  
Mouse *CXCR4*-R GAT GAT ATG GAC AGC CTT ACA C  
Mouse *B2M*\_F TTC TGG TGC TTG TCT CAC TGA  
Mouse *B2M*\_R CAG TAT GTT CGG CTT CCC ATT C  
Mouse *Jagged1*\_F CCT CGG GTC AGT TTG AGC TG  
Mouse *Jagged1*\_R CCT TGA GGC ACA CTT TGA AGT A  
Mouse *Jagged2*\_F CAC CAA TGA CTG CAA CCC T  
Mouse *Jagged2*\_R CGT GAA TAT GAC CAC TTC CTG  
Mouse *VEGFR2*\_F TTT GGC AAA TAC AAC CCT TCA GA  
Mouse *VEGFR2*\_R GCA GAA GAT ACT GTC ACC ACC  
Mouse *VEGFR3*\_F CTG GCA AAT GGT TAC TCC ATG A  
Mouse *VEGFR3*\_R ACA ACC CGT GTG TCT TCA CTG  
Mouse *Notch1*\_F CCA GCA GAT GAT CTT CCC GTA C  
Mouse *Notch1*\_R ACT GCC GCT ATT CTT GTC CC  
Mouse *Notch2*\_F ATG TGG ACG AGT GTC TGT TGC  
Mouse *Notch2*\_R GGA AGC ATA GGC ACA GTC ATC  
Mouse *Notch3*\_F TGC CAG AGT TCA GTG GTG G  
Mouse *Notch3*\_R CAC AGG CAA ATC GGC CAT C  
Mouse *Notch4*\_F ACG AGA GTA CCA CTC ATT CGG  
Mouse *Notch4*\_R TAA GAC CAA TGT TGT CCT CGC  
Mouse *KRT14*\_F CCA GGA GAT GAT CGG CAG  
Mouse *KRT14*\_R GAA GAT GAA AGG TGG GCG T  
Mouse  *$\beta$ -actin*\_F AAG ATC AAG ATC ATT GCT CCT C  
Mouse  *$\beta$ -actin*\_R GGA CTC ATC GTA CTC CTG  
Human *Notch1*\_F GAG GCG TGG CAG ACT ATG C  
Human *Notch1*\_R CTT GTA CTC CGT CAG CGT GA  
Human *Notch2*\_F GCC TTC GCC TCC TGT ACT C  
Human *Notch2*\_R GCC CAT TTA GGG GGT TGG T  
Human *Notch3*\_F ACA CAG GGC CAC TAT GTG AGA  
Human *Notch3*\_R CAC AGT CGT AAG TGA GGT CGC  
Human *Notch4*\_F GGG TGA GAC GTG CCA GTT TC

Human *Notch4*\_R CTG GGT GTC AAT GGA GAG GGA  
Human *Dll1*\_F TGC TGT GTC AGG TCT GGA G  
Human *Dll1*\_R CCT TCT TGT TGA CGA ACT CCT  
Human *Dll4*\_F AGC TGT AAG GAC CAG GAG  
Human *Dll4*\_R ACA TTC ACA AGC ATA GTT GG  
Human *Jagged1*\_F GTA ACA TAG CCC GAA ACA G  
Human *Jagged1*\_R ACC AGT TGT CTC CAT CCA  
Human *Jagged2*\_F CTC ACA ATA CCA ACG ACT G  
Human *Jagged2*\_R GAA CCC GAT CAC TTC CTG  
Human *PBGD*\_F AGG ATG GGC AAC TGT ACC  
Human *PBGD*\_R GTT TTG GCT CCT TTG CTC AG  
Human *Hes1*\_F CAC AGA AAG TCA TCA AAG CC  
Human *Hes1*\_R GTA TTA ACG CCC TCG CAC  
Human *Hey1*\_F TGA GTT CGG CTC TAG GTT CCA  
Human *Hey1*\_R GCG CTT CTC AAT TAT TCC TCT CC  
Human *Hey2*\_F GAG AAG ACT TGT GCC AAC TG  
Human *Hey2*\_R CGT CAA AGT AGC CTT TAC CC  
Human *GNBL2*\_F GAG TGT GGC CTT CTC CTC TG  
Human *GNBL2*\_R GCT TGC AGT TAG CCA GGT TC  
Human *RPL32*\_F CAT CTC CTT CTC GGC ATC A  
Human *RPL32*\_R AAC CCT GTT GTC AAT GCC TC  
Rat *Hey1*\_F TCG AGA AGC GCC GAC GAG ACC GA  
Rat *Hey1*\_R CAG CAG CGG GTG TGC GAT GTG TGG GT  
Rat *Hes5*\_F ACC GCA TCA ACA GCA GCA TT  
Rat *Hes5*\_R AGG CTT TGC TGT GCT TCA GG  
Rat *PBGD*\_F CAT GTA TGC TGT GGG TCA GG  
Rat *PBGD*\_R CAG GTA CAG TTG CCC ATC CT  
Rat *B2 M*\_F TCA CAC CCA CCG AGA CCG ATG T  
Rat *B2 M*\_R TCT CGG TCC CAG GTG ACG GTT T  
Rat *Dll4*\_F GAA ATT CAC TTA TCA GCC AA  
Rat *Dll4*\_R CAG GGG ATG GTG CAG GT  
Rat *Jagged1*\_F GCC CTG CGA GCC AAG GTG TG  
Rat *Jagged1*\_R CAC TCG TCG CGG GTG CAC TT

### **Section 3: Antibody information**

| <b>Primary Antibodies for IHC and ICC</b> |                   |                       |                              |
|-------------------------------------------|-------------------|-----------------------|------------------------------|
| <b>Antibody</b>                           | <b>Company</b>    | <b>Catalog number</b> | <b>IHC/ICC dilution</b>      |
| Dll4                                      | Abcam             | ab7280                | 1/200 (frozen)               |
| Dll4                                      | Novus Biologicals | NB600-892             | 1/100 (ICC)                  |
| Cleaved Notch1                            | Abcam             | ab8925                | 1/200 (frozen), 1/100 (FFPE) |
| CD31                                      | BD Biosciences    | 550274                | 1/200 (frozen)               |
| CD31                                      | Dianova           | DIA310                | 1/100 (FFPE)                 |
| Ki67                                      | Abcam             | ab15580               | 1/1000 (frozen, FFPE)        |
| PDGFR $\beta$                             | Abcam             | ab32570 (Y92)         | 1/50 (FFPE)                  |
| SDF-1                                     | Abcam             | ab25117               | 1/25 (FFPE)                  |
| VEGFR-2                                   | R&D systems       | AF644-SP              | 1/50 (FFPE)                  |
| VEGFR-3                                   | R&D systems       | AF743-SP              | 1/50 (FFPE)                  |

Frozen: Frozen sections; ICC: immunocytochemistry  
 FFPE: Formalin-fixed paraffin embedded sections

| <b>Secondary Antibodies for IHC and ICC</b> |                         |                       |                         |  |
|---------------------------------------------|-------------------------|-----------------------|-------------------------|--|
| <b>Antibody</b>                             | <b>Company</b>          | <b>Catalog number</b> | <b>IHC/ICC dilution</b> |  |
| Goat anti-Rabbit Alexa fluor 594            | ThermoFisher Scientific | A11037                | 1/500                   |  |
| Goat anti-rat Alexa fluor 488               | ThermoFisher Scientific | A11006                | 1/500                   |  |
| Donkey anti-goat Alexa fluor 488            | ThermoFisher Scientific | A11055                | 1/500                   |  |

| <b>Antibodies for western blotting</b> |                |                       |                 |  |
|----------------------------------------|----------------|-----------------------|-----------------|--|
| <b>Antibody</b>                        | <b>Company</b> | <b>Catalog number</b> | <b>dilution</b> |  |
| Cleaved Notch1                         | Cell signaling | 2421S                 | 1/1000          |  |
| Cleaved Notch1                         | Cell signaling | 4147                  | 1/500 – 1/200   |  |
| Cleaved Notch2                         | Abcam          | ab8926                | 1/500           |  |
| Notch3 C-terminus                      | ThermoFisher   | PA5-13203             | 1/500           |  |
| Notch4 C-terminus                      | Millipore      | 07-189                | 1/500           |  |
| Hes1                                   | Abcam          | ab71559               | 1/500           |  |
| Myc                                    | Cell Signaling | #2272S                | 1/500           |  |
| PDGFR $\beta$                          | Abcam          | ab32570               | 1/5000          |  |
| CXCR4                                  | Abcam          | ab124824              | 1/100           |  |
| Beta-Actin                             | Sigma          | A5441                 | 1/5000          |  |
| beta-actin                             | Abcam          | ab8227                | 1/3000          |  |
| IRDye 680RD Goat anti-rabbit           | LI-COR         | 926-68071             | 1/20000         |  |
| IRDye 800CW Goat anti-mouse            | LI-COR         | 926-32210             | 1/20000         |  |

## **Section 4: Supplemental Methods**

### **Laser microdissection followed by RNA purification and Quantitative RT-PCR**

Frozen sections with 20 $\mu$ m thickness were obtained from KRT14-Cre;Notch1<sup>fl/fl</sup> mice or WT mice on RNase-free MMI Membrane Slides (Molecular Machines & Industries). Just before the laser microdissection, the slides were thawed and dehydrated in 70% ethanol for 30 seconds. The excess liquid was wiped away and the slide was immersed into Hemotoxylin containing 1U/ $\mu$ L RNase inhibitor (Applied Biosystems) for 30 seconds. The slides were then washed in 70% ethanol for 20 seconds, in RNase-free water for 10 seconds, counterstained with 0.2% Eosin containing 1U/ $\mu$ L RNase inhibitor for 10 seconds, washed in 70% ethanol and water and dried at room temperature.

The laser microdissection was performed immediately after staining, using the MMI CellCut Laser Microdissection system (Molecular Machines & Industries). Briefly, the MMI Membrane Slide with the tissue section was inverted onto a clean glass slide and placed in the holder of the CellCut system microscope. The laser power was adjusted according to the thickness and toughness of the tissue section and the epidermal and dermal tissues were dissected and captured into separate MMI Isolation Caps (Molecular Machines & Industries) and immediately frozen on dry ice. RNA was isolated from the tissue pieces using the ARCTURUS PicoPure RNA Isolation kit (ThermoFisher Scientific). The cDNA was prepared using the SuperScript IV First-Strand Synthesis System (ThermoFisher Scientific). Quantitative RT-PCR was performed on a 7300 Real-Time PCR System using SYBR Green Master Mix (ThermoFisher Scientific). The primer sequences are presented in Supporting Information 2.  $\beta$ -actin or keratin 14 (KRT14) was used as internal control.

**Table S1: Gene list with fold change and p value in RT2 Profiler PCR array**

| Gene Symbol | Refseq       | Description                                                                                   | Fold Change   | T-TEST  |
|-------------|--------------|-----------------------------------------------------------------------------------------------|---------------|---------|
|             |              |                                                                                               | db/db/Control | p value |
| Abl1        | NM_009594    | C-abl oncogene 1, non-receptor tyrosine kinase                                                | 4.36          | 0.0804  |
| Adamts1     | NM_009621    | A disintegrin-like and metallopeptidase (reprolysin type) with thrombospondin type 1 motif, 1 | 2.36          | 0.1114  |
| Bdnf        | NM_007540    | Brain derived neurotrophic factor                                                             | 241.62        | 0.0160  |
| Cbfa2t3     | NM_009824    | Core-binding factor, runt domain, alpha subunit 2, translocated to, 3 (human)                 | 10.16         | 0.0452  |
| Ccnd1       | NM_007631    | Cyclin D1                                                                                     | 105.59        | 0.0995  |
| Ccnd2       | NM_009829    | Cyclin D2                                                                                     | 20.99         | 0.0114  |
| Clock       | NM_007715    | Circadian locomotor output cycles kaput                                                       | 4.24          | 0.0750  |
| Crebbp      | NM_001025432 | CREB binding protein                                                                          | 11.97         | 0.0828  |
| Cx3cl1      | NM_009142    | Chemokine (C-X3-C motif) ligand 1                                                             | 8.37          | 0.0618  |
| Cxcl1       | NM_008176    | Chemokine (C-X-C motif) ligand 1                                                              | 305.77        | 0.0468  |
| Cxcl12      | NM_021704    | Chemokine (C-X-C motif) ligand 12                                                             | 18.69         | 0.0006  |
| Edn1        | NM_010104    | Endothelin 1                                                                                  | 2.84          | 0.0417  |
| Efna1       | NM_010107    | Ephrin A1                                                                                     | 4.35          | 0.0202  |
| Efnb1       | NM_010110    | Ephrin B1                                                                                     | 1.37          | 0.3015  |
| Egr3        | NM_018781    | Early growth response 3                                                                       | 1.45          | 0.1763  |
| Fabp7       | NM_021272    | Fatty acid binding protein 7, brain                                                           | 285.56        | 0.0501  |
| Fjx1        | NM_010218    | Four jointed box 1 (Drosophila)                                                               | 6.41          | 0.0678  |
| Flt1        | NM_010228    | FMS-like tyrosine kinase 1                                                                    | 23.16         | 0.0484  |
| Foxc1       | NM_008592    | Forkhead box C1                                                                               | 1.6           | 0.2185  |
| Frzb        | NM_011356    | Frizzled-related protein                                                                      | 16.63         | 0.0211  |
| Fzd5        | NM_022721    | Frizzled homolog 5 (Drosophila)                                                               | 157.19        | 0.0924  |
| Gadd45b     | NM_008655    | Growth arrest and DNA-damage-inducible 45 beta                                                | 2.42          | 0.0650  |
| Gpsm2       | NM_029522    | G-protein signalling modulator 2 (AGS3-like, C. elegans)                                      | 5.26          | 0.0664  |
| Hbegf       | NM_010415    | Heparin-binding EGF-like growth factor                                                        | 22.82         | 0.0064  |
| Hes1        | NM_008235    | Hairy and enhancer of split 1 (Drosophila)                                                    | 12.85         | 0.0054  |
| Hey1        | NM_010423    | Hairy/enhancer-of-split related with YRPW motif 1                                             | 12.58         | 0.1451  |
| Hey2        | NM_013904    | Hairy/enhancer-of-split related with YRPW motif 2                                             | 13.66         | 0.0209  |
| Heyl        | NM_013905    | Hairy/enhancer-of-split related with YRPW motif-like                                          | 2.59          | 0.1186  |
| Hspb8       | NM_030704    | Heat shock protein 8                                                                          | 6.67          | 0.0225  |
| Id1         | NM_010495    | Inhibitor of DNA binding 1                                                                    | -1.4          | 0.4581  |
| Id2         | NM_010496    | Inhibitor of DNA binding 2                                                                    | 8.5           | 0.0016  |
| Id3         | NM_008321    | Inhibitor of DNA binding 3                                                                    | -1.27         | 0.9151  |
| Id4         | NM_031166    | Inhibitor of DNA binding 4                                                                    | 54.57         | 0.0418  |
| Igfbp3      | NM_008343    | Insulin-like growth factor binding protein 3                                                  | 726.3         | 0.0044  |
| Il33        | NM_133775    | Interleukin 33                                                                                | 8.98          | 0.0046  |
| Jag1        | NM_013822    | Jagged 1                                                                                      | 2.82          | 0.1440  |
| Jun         | NM_010591    | Jun oncogene                                                                                  | 5.52          | 0.0318  |
| Kalrn       | NM_001164268 | Kalirin, RhoGEF kinase                                                                        | 2.67          | 0.1358  |
| Kitl        | NM_013598    | Kit ligand                                                                                    | 1.03          | 0.6487  |
| Krt14       | NM_016958    | Keratin 14                                                                                    | 2.57          | 0.0183  |
| Lfng        | NM_008494    | LFNG O-fucosylpeptide 3-beta-N-acetylglucosaminyltransferase                                  | 24.14         | 0.0181  |
| Mark1       | NM_145515    | MAP/microtubule affinity-regulating kinase 1                                                  | 38.27         | 0.0578  |
| Msc         | NM_010827    | Musculin                                                                                      | 711.85        | 0.0322  |
| Nampt       | NM_021524    | Nicotinamide phosphoribosyltransferase                                                        | 16.44         | 0.0018  |
| Nes         | NM_016701    | Nestin                                                                                        | 14.76         | 0.0534  |
| Nrarp       | NM_025980    | Notch-regulated ankyrin repeat protein                                                        | 3.51          | 0.2010  |
| Pbx1        | NM_183355    | Pre B-cell leukemia transcription factor 1                                                    | 3.09          | 0.0014  |
| Pcdh8       | NM_021543    | Protocadherin 8                                                                               | 49.32         | 0.2669  |
| Pdgfb       | NM_011057    | Platelet derived growth factor, B polypeptide                                                 | 7.06          | 0.0217  |
| Pdgfra      | NM_011058    | Platelet derived growth factor receptor, alpha polypeptide                                    | 3.52          | 0.0107  |
| Pdgfrb      | NM_008809    | Platelet derived growth factor receptor, beta polypeptide                                     | 4.59          | 0.0331  |
| Ptgs2       | NM_011198    | Prostaglandin-endoperoxide synthase 2                                                         | 14.04         | 0.1141  |
| Rbpj        | NM_009035    | Recombination signal binding protein for immunoglobulin kappa J region                        | 3.27          | 0.0856  |
| Rhov        | NM_145530    | Ras homolog gene family, member V                                                             | 1.62          | 0.2064  |
| Rnd1        | NM_172612    | Rho family GTPase 1                                                                           | 38.06         | 0.0493  |
| Runx1       | NM_009821    | Runt related transcription factor 1                                                           | 3.52          | 0.0259  |
| Runx2       | NM_009820    | Runt related transcription factor 2                                                           | 5             | 0.0751  |

|       |              |                                            |        |        |
|-------|--------------|--------------------------------------------|--------|--------|
| S1pr3 | NM_010101    | Sphingosine-1-phosphate receptor 3         | 2.13   | 0.1433 |
| Sgpl1 | NM_009163    | Sphingosine phosphate lyase 1              | 1.1    | 0.4541 |
| Snw1  | NM_025507    | SNW domain containing 1                    | 9.26   | 0.0177 |
| Socs3 | NM_007707    | Suppressor of cytokine signaling 3         | 4.36   | 0.0793 |
| Sox9  | NM_011448    | SRY-box containing gene 9                  | 20.25  | 0.4049 |
| Tcf15 | NM_009328    | Transcription factor 15                    | 214.77 | 0.0133 |
| Tec   | NM_001113460 | Tec protein tyrosine kinase                | 3.99   | 0.0167 |
| Tnc   | NM_011607    | Tenascin C                                 | -1.02  | 0.5946 |
| Vegfa | NM_009505    | Vascular endothelial growth factor A       | 19.92  | 0.0152 |
| Wisp1 | NM_018865    | WNT1 inducible signaling pathway protein 1 | 5.07   | 0.0448 |
| Wnt4  | NM_009523    | Wingless-related MMTV integration site 4   | 1.53   | 0.2209 |
| Wnt5a | NM_009524    | Wingless-related MMTV integration site 5A  | 2.44   | 0.1311 |
| Wnt6  | NM_009526    | Wingless-related MMTV integration site 6   | 8.01   | 0.0627 |



**Table S2: Information of the patients with diabetes and Controls**

| <b>Donor</b> | <b>Group</b> | <b>Gender</b> | <b>Age</b> | <b>HbA1c<br/>(mmol/mol)</b> | <b>Medication</b>                                                                                                    | <b>Diagnosis</b>                                                   | <b>Duration of<br/>diabetes (years)</b> |
|--------------|--------------|---------------|------------|-----------------------------|----------------------------------------------------------------------------------------------------------------------|--------------------------------------------------------------------|-----------------------------------------|
| 01           | Diabetes     | M             | 81         | 45                          | Insulin aspart, Insulin aspart protamin, acetylsalicylic acid, Imatinip, Bisoprolol, Furosemide, Fluoxacillin.       | T2DM, DFU, Dyslipidemia, TIA, CAD, CML                             | 35                                      |
| 03           | Diabetes     | M             | 77         | 63                          | Glipizide, Insulin aspart, Insulin aspart protamine, Prednisolone.                                                   | T2DM, DFU, Hypertension, COPD                                      | 13                                      |
| 04           | Diabetes     | F             | 57         | 63                          | Flucloxacillin, Sitagliptin, Repaglinide, Furosemide, Felodipine, Enalapril, Atorvastatin, Oxycondone                | T2DM, DFU, Osteomyelitis, Chronic Charcot foot                     | 10                                      |
| 05           | Diabetes     | M             | 60         | 74                          | Metformin, Insulin Apart, Insulin Glargine, Atenolol, Lisinopril, Fluoxacillin.                                      | T2DM, DFU, Hypertension                                            | 15                                      |
| 06           | Diabetes     | M             | 66         | 45                          | Metformin, Insulin Apart, Insulin Glargine, Atenolol, Lisinopril, Fluoxacillin.                                      | T2DM, DFU, Hypertension, Renal failure stage 3, TIA                | 15                                      |
| 07           | Diabetes     | M             | 70         | 51                          | Insulin Glargine                                                                                                     | T2DM, DFU, Renal failure stage 3                                   | 13                                      |
| 22           | Diabetes     | M             | 69         | -                           | Insulin Glargine, Metformin                                                                                          | T2DM, DFU, Hypertension, Dyslipidemia                              | 19                                      |
| 23           | Diabetes     | M             | 86         | 61                          | Insulin aspart, Insulin aspart protamine                                                                             | T2DM, DFU, Hypertension, Dyslipidemia, Atrial fibrillation, TIA,   | 25                                      |
| 27           | Diabetes     | M             | 64         | 79                          | Insulin Glargine, Insulin Aspart, Acetylsalicylic acid, Furosemid, Metoprolol, Enalapril, Simvastatin, Ciprofloxacin | T2DM, DFU, Hypertension, Dyslipidemia, Renal failure stage 3, COPD | 31                                      |
| 30           | Control      | F             | 74         | 41                          | Enalapril, Felodipin, Bisoprolol, Atorvastatin, L-Thyroxine                                                          | Hypertension, Goiter, Breast cancer                                | -                                       |
| 31           | Control      | M             | 76         | 37                          | -                                                                                                                    |                                                                    | -                                       |
| 32           | Control      | F             | 58         | 35                          | Candesartan                                                                                                          | Hypertension                                                       | -                                       |
| 33           | Control      | F             | 54         | 37                          | -                                                                                                                    | -                                                                  | -                                       |
| 34           | Control      | F             | 71         | 44                          | L-Thyroxine                                                                                                          | Hypothyreoidism                                                    | -                                       |
| 35           | Control      | M             | 71         | 41                          | Enalapril                                                                                                            | Hypertension                                                       | -                                       |

|    |         |   |    |    |                         |                                    |
|----|---------|---|----|----|-------------------------|------------------------------------|
| 36 | Control | M | 83 | 41 | -                       | -                                  |
| 37 | Control | F | 74 | 43 | Glucosamine             | Osteoarthritis,                    |
| 38 | Control | M | 48 | 36 | D vitamin               | -                                  |
| 39 | Control | M | 62 | 37 | -                       | -                                  |
| 40 | Control | F | 73 | 39 | -                       | Irritable bowel syndrome (IBS)     |
| 41 | Control | F | 67 | 44 | Atorvastatin, Losartan. | Hypertension. Dyslipidemia,        |
| 42 | Control | M | 74 | 40 | -                       | Benign prostatic hyperplasia (BPH) |

T2DM: Type 2 Diabetes

DFU: Diabetes foot ulcer

TIA: Transient ischemic attack

CAD: Chronic coronary artery disease

COPD: Chronic obstructive pulmonary disease

## Supplemental figures and figure legends

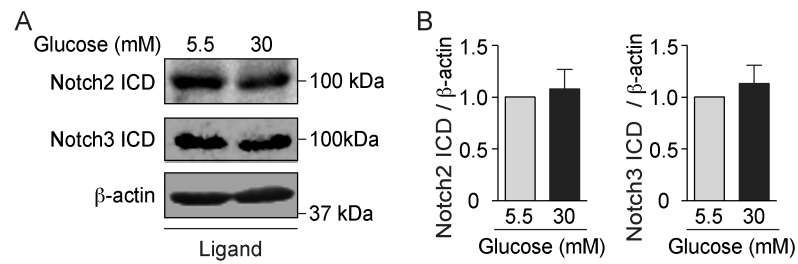

**Fig. S1 (related to Fig. 3). High glucose levels do not affect the expression of Notch2 ICD or Notch3 ICD.** (A-B) Primary human keratinocytes were exposed to 5.5 mM or 30 mM glucose for 24 h. Endogenous Notch2 ICD and Notch3 ICD protein levels were detected by Western blotting. Quantification is shown in panel B (n=4).

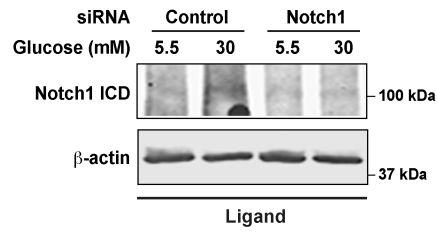

**Fig. S2 (related to Fig. 3). The stimulatory effect of high glucose levels on Notch1 ICD expression is abolished by siRNA targeting Notch1.** Primary human keratinocytes were exposed to 5.5 mM or 30 mM glucose for 24 h after transfection with control siRNA or siRNA targeting Notch1. Endogenous Notch1 ICD and  $\beta$ -actin protein levels were detected by Western blotting.

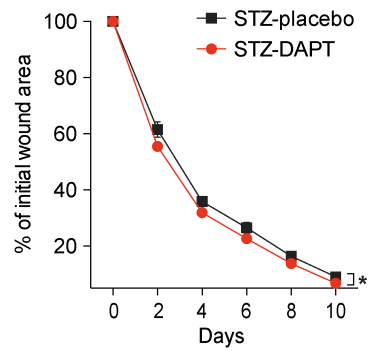

**Fig. S3 (related to Fig. 4). Local inhibition of Notch signaling improves wound healing in STZ-induced diabetic mice.** Full-thickness wounds were made on the dorsum of STZ-induced diabetic mice, and the wounds were treated locally with  $\gamma$ -secretase inhibitors DAPT (100 $\mu$ M) or DMSO (placebo) every second day. The wound healing rate was analyzed and shown as the percentage of the initial wound area (n=5-6). \*,  $P < 0.05$  analyzed by Two-way ANOVA.

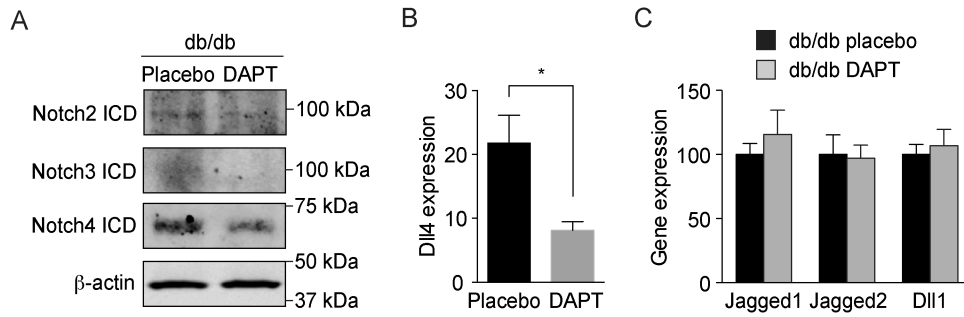

**Fig. S4 (related with Fig. 4): Effects of DAPT on the expression of other Notch receptors and ligands in diabetic wounds.** Full-thickness wounds were made on the dorsum of db/db mice, and the wounds were treated locally with  $\gamma$ -secretase inhibitor DAPT (100 $\mu$ M) or DMSO (placebo). **(A)** Western blotting results showing the expression of Notch2 ICD, Notch3 ICD, Notch4 ICD and  $\beta$ -actin in the wounds. **(B)** Dll4 expression was evaluated using fluorescent immunohistochemistry and the quantification results are shown (n=8-10). \*,  $P < 0.05$ . **(C)** Gene expression of Jagged1, Jagged2 and Dll1 were analyzed by QPCR (n=7-8).

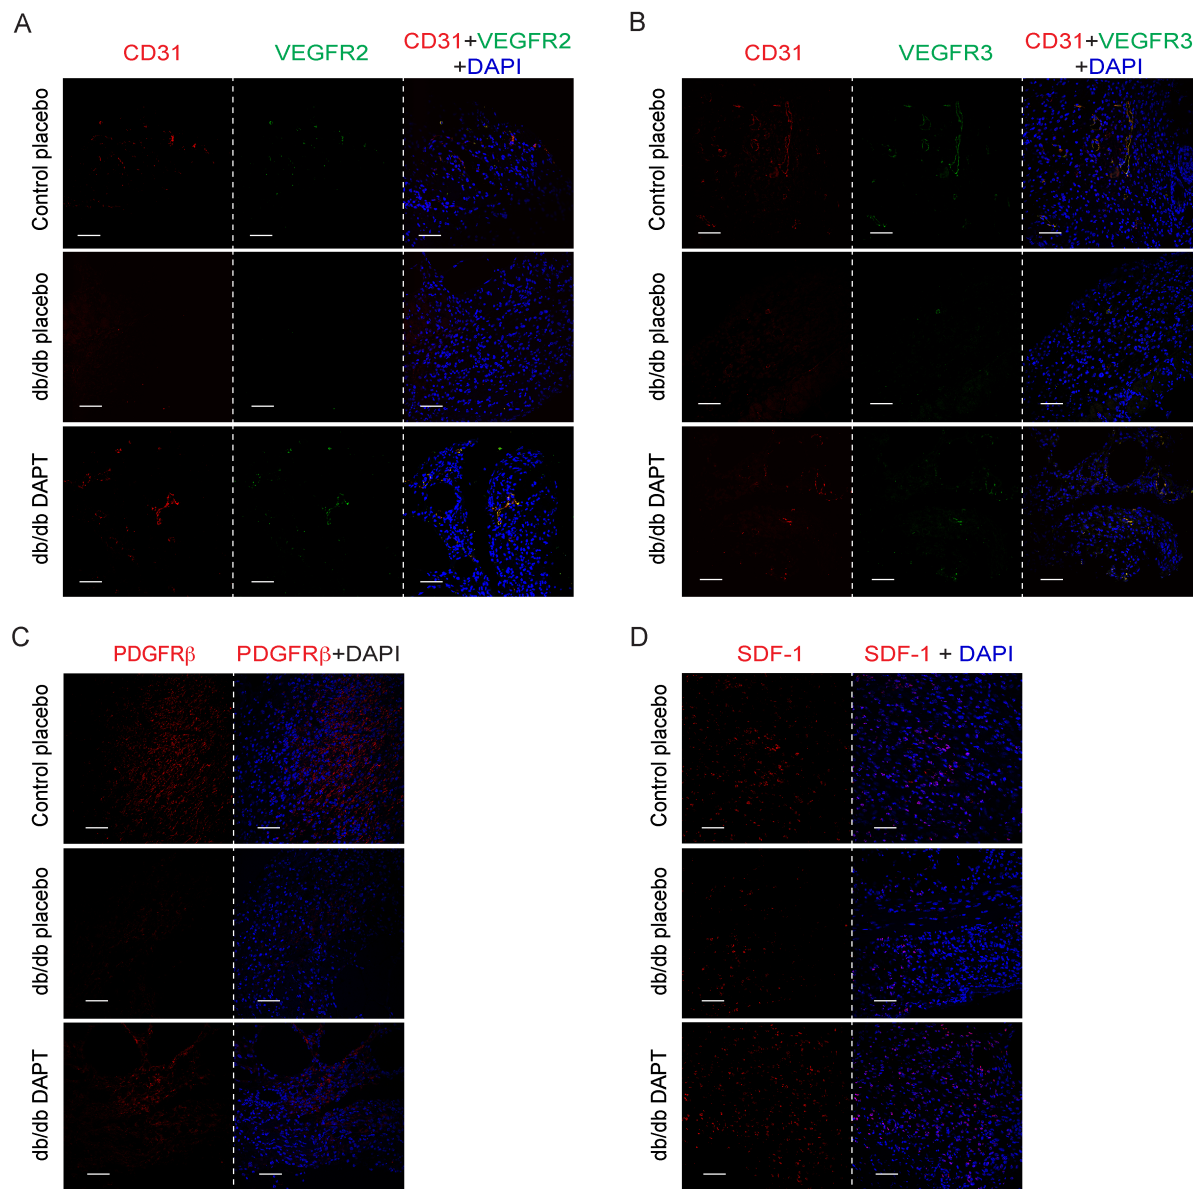

**Fig. S5 (related to Fig. 4). Inhibition of Notch signaling improves angiogenesis in diabetic mice. (A-B)** Representative images of immunohistochemical staining for CD31 (red), VEGFR2 (green), VEGFR3 (green), DAPI (blue) and merged images. **(C-D)** Representative images of immunohistochemistry for PDGFR $\beta$  (red), SDF-1 (red), DAPI (blue) and merged images.

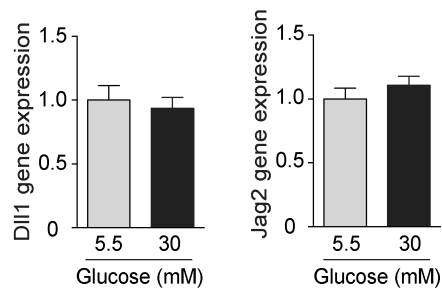

**Fig. S6 (related to Fig. 5). High glucose levels do not affect the gene expression of *Dll1* or *Jagged2*.** Relative *Dll1* and *Jagged2* (*Jag2*) gene expression in human primary keratinocytes exposed to 5.5 mM or 30 mM glucose (n=7).



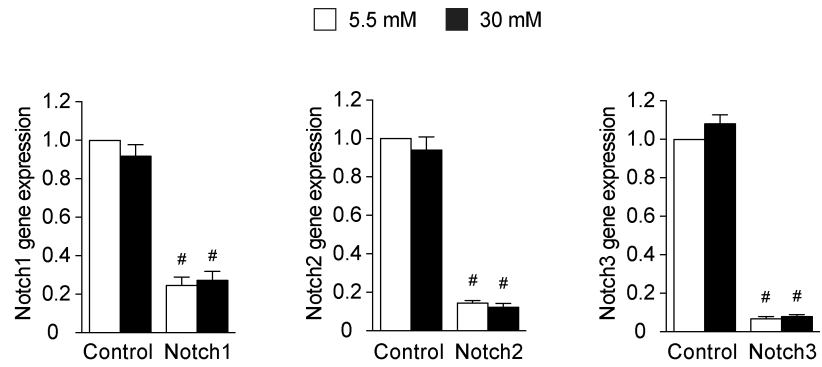

**Fig. S7 (related with Fig. 5): RNA interference efficacy in primary human keratinocytes.** Relative Notch1, Notch2, and Notch3 mRNA levels in keratinocytes transfected with siRNA for *Notch1*, *Notch2*, *Notch3* or control siRNA (n=4-5). #,  $P < 0.05$  compared with the corresponding Control siRNA.

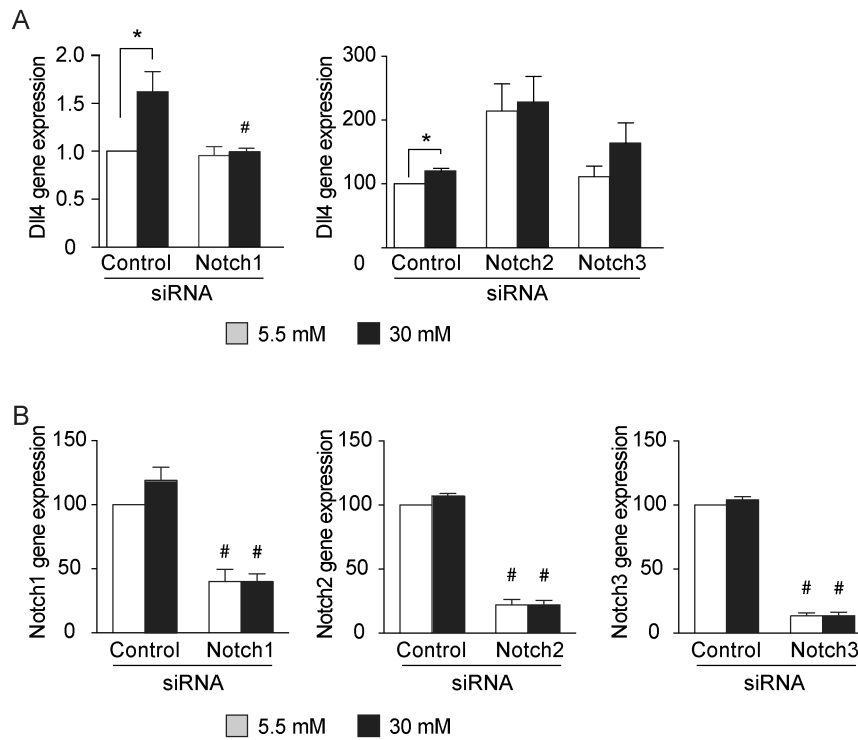

**Fig. S8 (related with Fig. 5): Induction of Dll4 by high glucose levels is dependent on Notch1 in keratinocytes – results from another set of siRNA. (A and B) Relative Dll4, Notch1, Notch2, and Notch3 mRNA levels in keratinocytes transfected with siRNA for *Notch1*, *Notch2*, *Notch3* or control siRNA (n=3). \*,  $P < 0.05$  compared with cells exposed to 5.5 mM glucose; #,  $P < 0.05$  compared with the corresponding Control siRNA.**

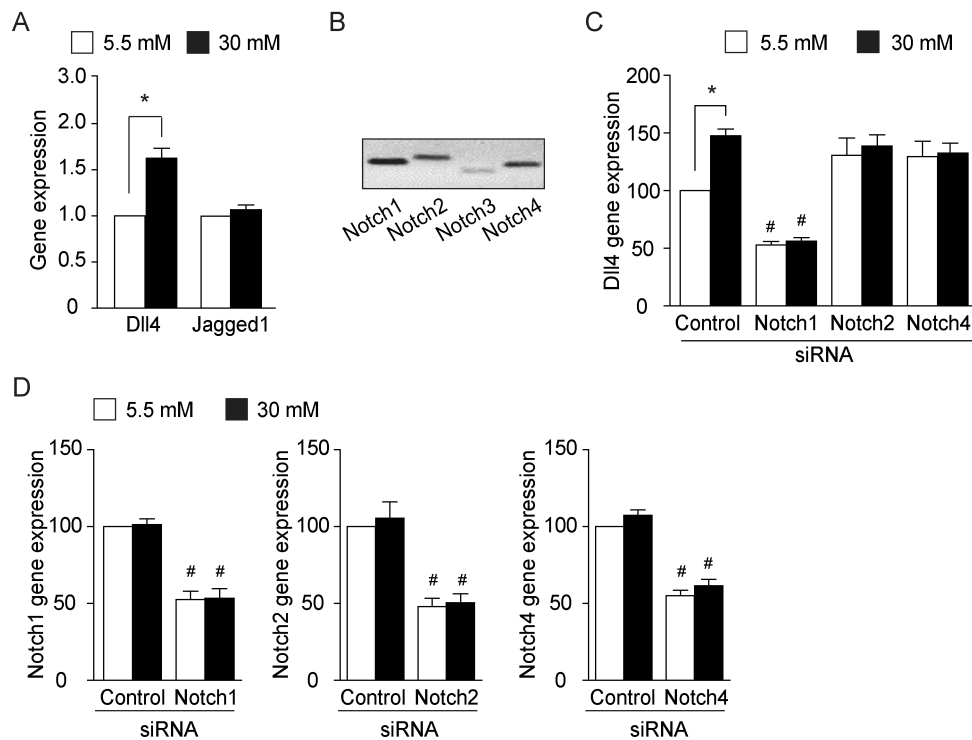

**Fig. S9 (related with Fig. 5): Induction of Dll4 by high glucose levels is dependent on Notch1 in HDMEC.** (A) Relative Dll4 and Jagged1 gene expression in HDMECs exposed to 5.5 mM or 30 mM glucose (n=5). (B) Agarose gel image showing the gene expression of Notch1, 2, 3, and 4 in HDMEC. (C and D) Relative Dll4, Notch1, Notch2, and Notch4 mRNA levels in HDMECs transfected with siRNA for *Notch1*, *Notch2*, *Notch4* or control siRNA (n=3). \*,  $P < 0.05$  compared with cells exposed to 5.5 mM glucose; #,  $P < 0.05$  compared with the corresponding Control siRNA.

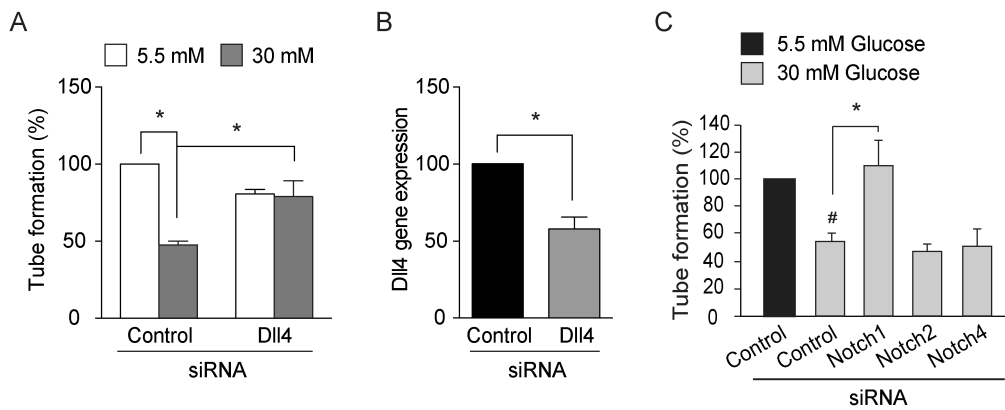

**Fig. S10 (related with Fig. 5): High glucose levels inhibit angiogenesis via activation of a positive Dll4-Notch1 feedback loop.** HDMECs were transfected with Control siRNA or siRNA silencing Dll4, Notch1, Notch 2, or Notch 4. The cells were cultured in medium containing 5.5 mM or 30 mM glucose for 24 h prior to the *in vitro* angiogenesis assay wherein tube formation was evaluated. **(A and C)** Evaluation of tube formation of HDMECs (n=3-5). **(B)** The relative gene expression of Dll4 in HDMECs that were transfected with control siRNA (Control) or siRNA silencing *Dll4* (n=5). \*,  $P < 0.05$ . #,  $P < 0.05$  comparing with cells exposed to 5.5 mM glucose.

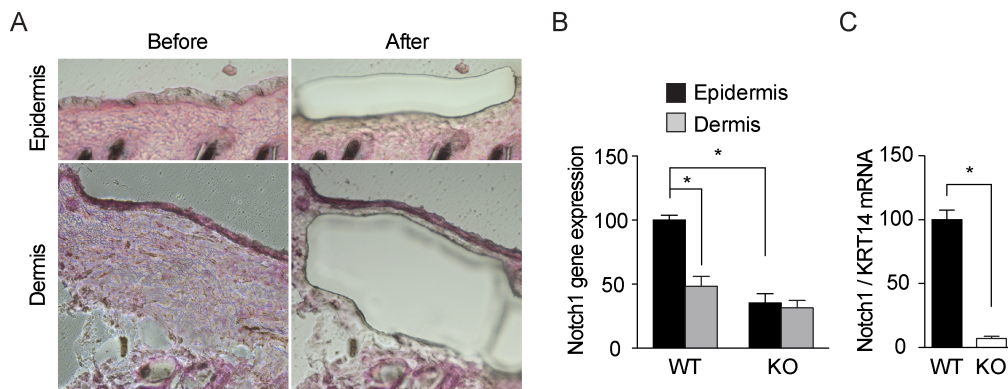

**Fig. S11 (related with Fig. 6): Notch1 gene expression in the epidermis and dermis of the skin-specific Notch1-knockout *KRT14-Cre;Notch<sup>fl/fl</sup>* (KO) mice and Wild-type (WT) mice. (A) Representative images of the epidermis and dermis before and after Laser microdissection. (B) Relative Notch1 gene expression in epidermis and dermis prepared using Laser microdissection (n=3). \*,  $P < 0.05$ . (C) Notch1 gene expression normalized to KRT14 gene expression in epidermis from WT and KO mice (n=3). \*,  $P < 0.05$ .**

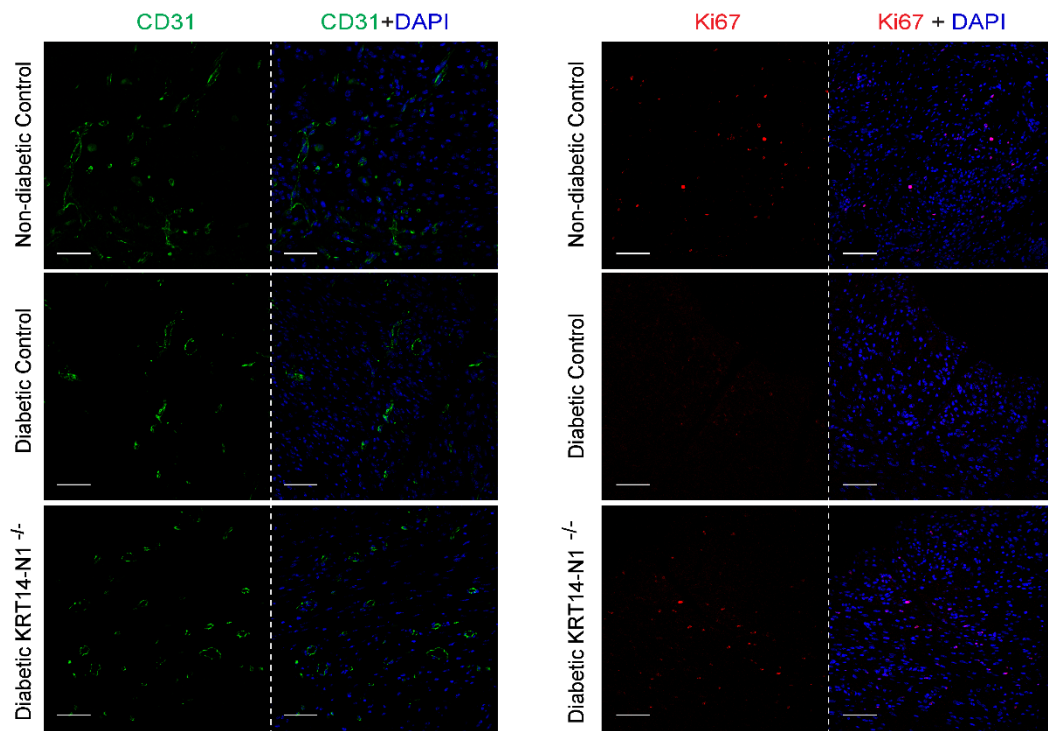

**Fig. S12 (related to Fig. 6). Notch1 gene ablation in the skin promotes angiogenesis and proliferation in diabetic wound.** Representative images of immunohistochemical staining for CD31 (green), Ki67 (red) and DAPI (blue) in wounds from non-diabetic Control mice, diabetic Control mice and diabetic *KRT14-Notch1*<sup>-/-</sup> mice.

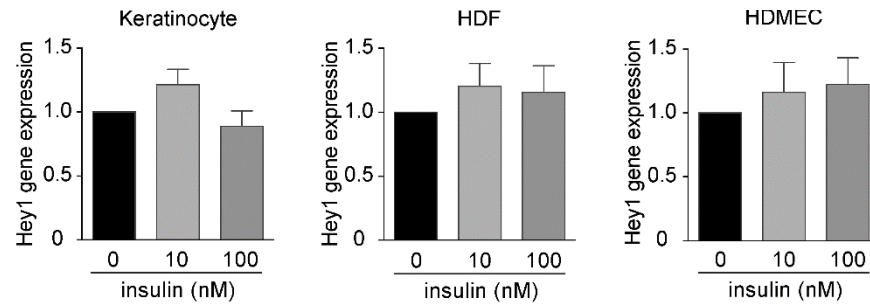

**Fig. S13. Effect of insulin on Notch target gene expression.** Primary human keratinocytes (n=3), human dermal fibroblasts (HDF, n=3) and human dermal microvascular endothelial cells (HDMEC, n=5), starved before, were exposed to different concentrations of insulin or vehicle. Relative Hey1 mRNA expression levels are shown.
